# Supplementary material for: Adipose Tissue Mitochondrial Factors Profile after Dietary Bioactive Compound Weight Reduction Treatments in a Mice Obesity Model
Source: Int J Mol Sci. 2019 Nov 22;20(23):5870. doi: 10.3390/ijms20235870 (PMC6928597; doi:10.3390/ijms20235870)

## **Supplementary information**

### **Adipose tissue mitochondrial factors profile after diet treatments**

*Anna Cassanye, Meritxell Martín-Gari, Manuel Portero-Otin, José CE Serrano\**

Department of Experimental Medicine, NUTREN-Nutrigenomics, University of Lleida

\* Corresponding author: [jceserrano@mex.udl.cat](mailto:jceserrano@mex.udl.cat)

### **Supplementary information contains:**

- Supplementary Table S1 and S2
- Supplementary Figures S1 and S2

**Table S1.** *Dietary and nutritional composition of experimental diets.* Fish oil was purchased from Sigma-Aldrich (F8020 Lot#051M1861V), which contains 28.6% of Omega-3 fatty acids and 19.7% of palmitic acid. Soluble fibre, plantago ovata, was purchased from Laboratorios Normon, S.A. (Spain). Soy was purchased from a local supermarket (Vivesoy, Pascual-Spain), which has a nutritional composition of 19% fat, 27% carbohydrates (23% of sugars), 34% protein and 7.8% fibre.

| <b>Ingredients<br/>(g/kg)</b> | <b>Normocaloric</b> | <b>High-fat</b> | <b>Normocaloric</b> |               |      | <b>High-fat</b> |               |      |
|-------------------------------|---------------------|-----------------|---------------------|---------------|------|-----------------|---------------|------|
|                               |                     |                 | Fish oil            | Soluble fibre | Soy  | Fish oil        | Soluble fibre | Soy  |
| <b>Casein</b>                 | 245                 | 245             | 245                 | 245           | 235  | 245             | 245           | 235  |
| <b>L-cysteine</b>             | 3.5                 | 3.5             | 3.5                 | 3.5           | 3.5  | 3.5             | 3.5           | 3.5  |
| <b>Corn starch</b>            | 302                 | 85              | 302                 | 265           | 297  | 85              | 68            | 79   |
| <b>Sucrose</b>                | 174                 | 200             | 174                 | 153           | 164  | 200             | 159           | 191  |
| <b>Lard</b>                   | 0                   | 250             | 0                   | 0             | 0    | 250             | 250           | 250  |
| <b>Corn oil</b>               | 109                 | 90              | 55                  | 109           | 103  | 36              | 90            | 84   |
| <b>Cellulose</b>              | 58                  | 58              | 58                  | 58            | 56   | 58              | 58            | 56   |
| <b>AIN-93 Mineral mix</b>     | 43                  | 43              | 43                  | 43            | 43   | 43              | 43            | 43   |
| <b>AIN-93 Vitamin mix</b>     | 19                  | 19              | 19                  | 19            | 19   | 19              | 19            | 19   |
| <b>Calcium phosphate</b>      | 3.4                 | 3.4             | 3.4                 | 3.4           | 3.4  | 3.4             | 3.4           | 3.4  |
| <b>Choline bitartrate</b>     | 3                   | 3               | 3                   | 3             | 3    | 3               | 3             | 3    |
| <b>Bioactive compound</b>     | -                   | -               | 54                  | 58            | 33   | 54              | 58            | 33   |
| <b>Water</b>                  | 40.1                | -               | 40.1                | 40.1          | 40.1 | -               | -             | -    |
| <b>Energy (kcal/g)</b>        | 3.88                | 5.19            | 3.88                | 3.65          | 3.88 | 5.19            | 4.96          | 5.19 |
| <b>% Protein</b>              | 26                  | 19              | 26                  | 27            | 26   | 19              | 20            | 19   |
| <b>% Fat</b>                  | 25                  | 59              | 25                  | 26            | 25   | 59              | 62            | 59   |
| <b>% Carbohydrates</b>        | 49                  | 22              | 49                  | 47            | 49   | 22              | 18            | 22   |

**Table S2.** *TaqMan probe assays for gene expression analysis.*

| <b>Gene</b>            | <b>Probe assay ID</b> |
|------------------------|-----------------------|
| <b><i>FASN</i></b>     | Mm00662319_m1         |
| <b><i>PPARG</i></b>    | Mm00440940_m1         |
| <b><i>IRS1</i></b>     | Mm01278327_m1         |
| <b><i>ADIPOQ</i></b>   | Mm00456425_m1         |
| <b><i>LEP</i></b>      | Mm00434759_m1         |
| <b><i>PLIN1</i></b>    | Mm00558672_m1         |
| <b><i>DGAT1</i></b>    | Mm00772290_m1         |
| <b><i>TNFALPHA</i></b> | Mm00443258_m1         |
| <b><i>IL6</i></b>      | Mm00446190_m1         |
| <b><i>CYBA</i></b>     | Mm00514478_m1         |
| <b><i>TFAM</i></b>     | Mm00447485_m1         |
| <b><i>NRF1</i></b>     | Mm01135606_m1         |
| <b><i>18S</i></b>      | Mm03928990_g1         |

**Figure S1.** *Gene expression analysis in adipose tissue.* Results are presented as the expression ratio relative to 18S gene expression. Differences between groups were determined by one-way ANOVA and multiple comparisons were performed comparing the mean of each group with the mean of the Control normocaloric (a), Control High-Fat (b) and Treatment Normocaloric (c) diets. Correction for multiple comparisons was performed with Dunnett test and p-values below 0.05 (marked in bold) were considered as a significant difference between groups (\*  $p < 0.05$ , \*\*  $p < 0.01$ , \*\*\*  $p < 0.001$ )

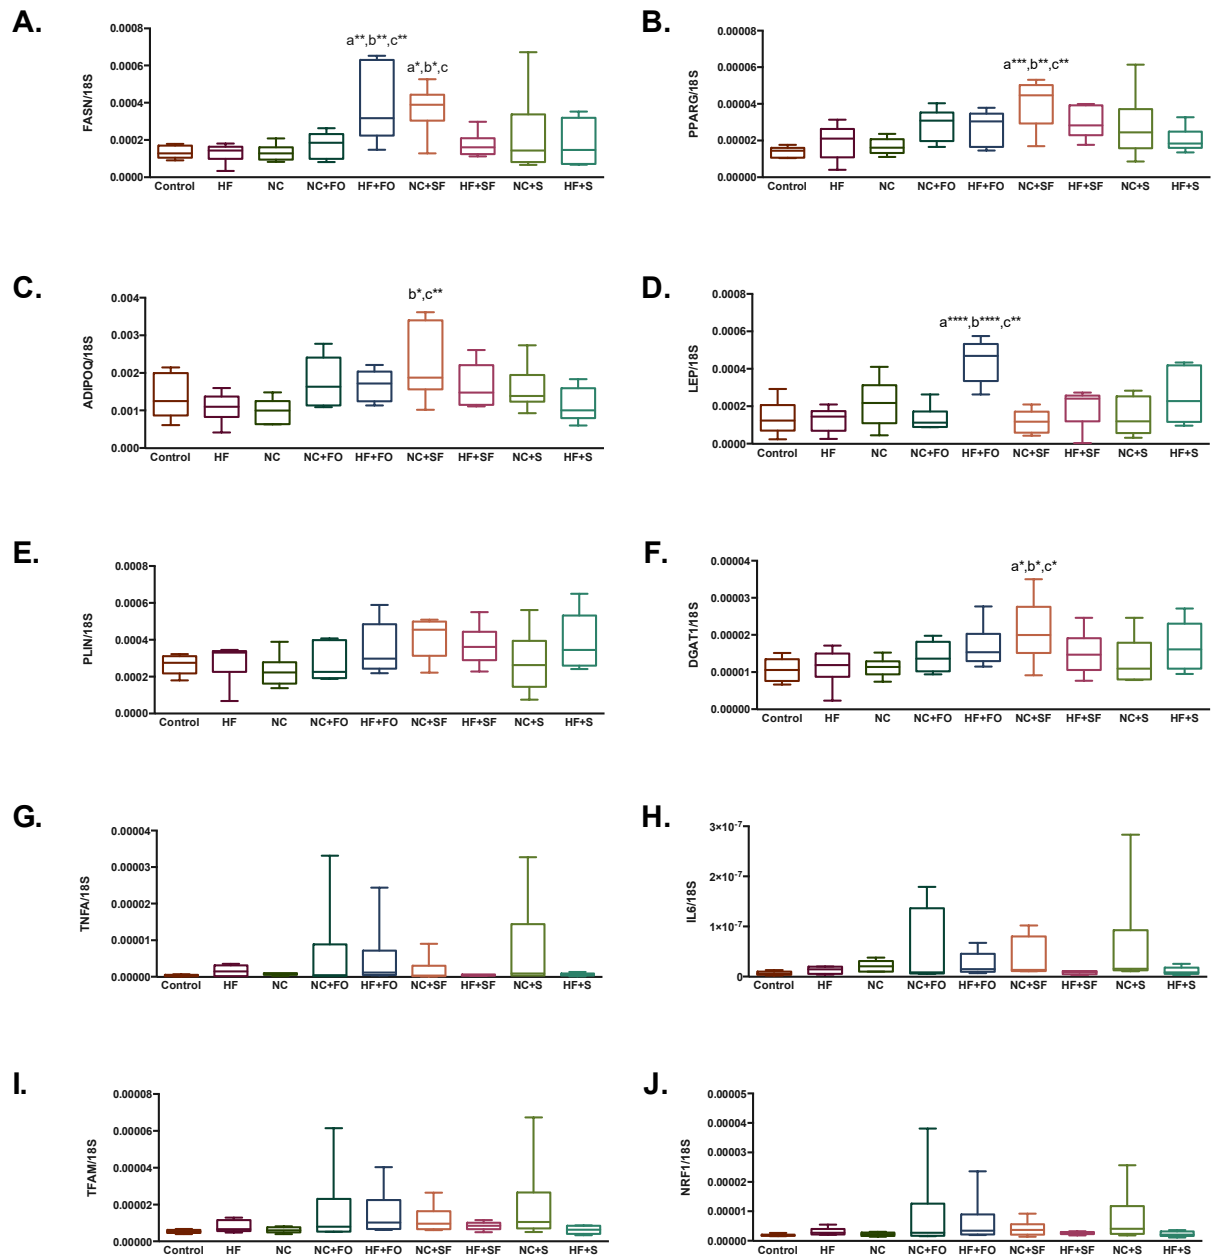

**Figure S2.** *Experimental procedure scheme.* The total duration of the study was 6 months. The first 4 months were dedicated to induce obesity through a high-fat diet. After that, mice were divided in 8 groups, where different treatments to induce metabolic changes were performed. A control group fed with a normocaloric diet was included through out the entire experimentation time.

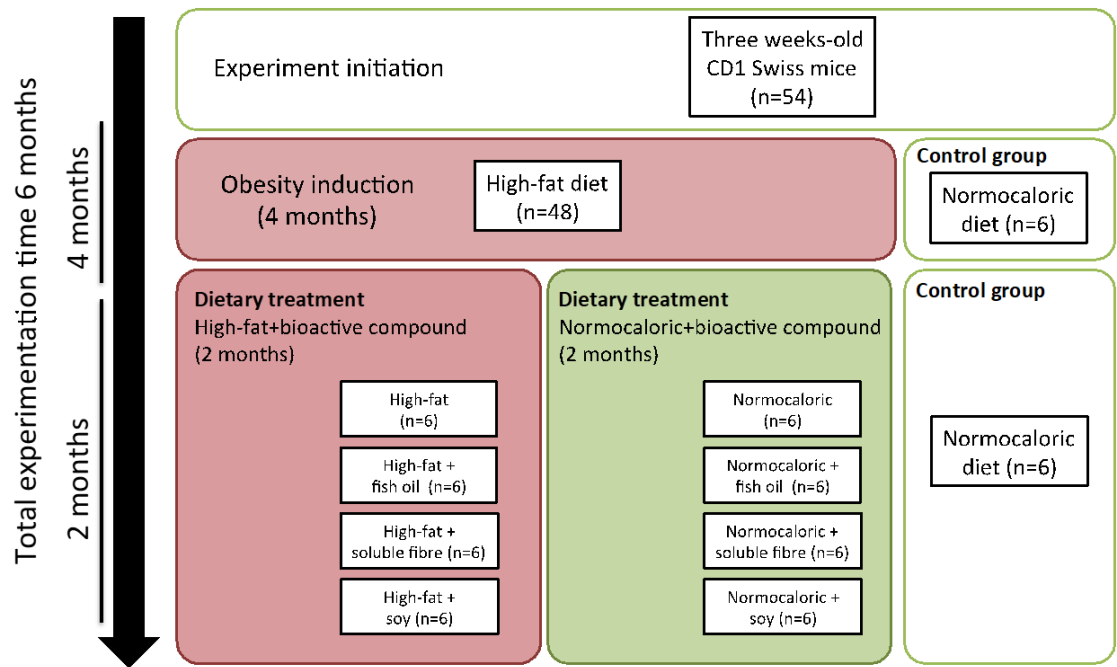

Supplement: Supplementary file 1 [file ijms-20-05870-s001.pdf]
